# Supplementary material for: In vitro antifungal effect of plant-based and Ulva sp. extracts on Aspergillus flavus growth and conidia germination
Source: Research Square preprint supplement (doi:10.21203/rs.3.rs-8599991/v1), 2026-02-17

**Supplementary data**

**“*In vitro* antifungal effect of plant-based and *Ulva* sp. extracts on *Aspergillus flavus* growth and conidia germination”**

Giacomo Boscarol1, Alessandra Di Francesco1, Enrico Braidot1*, Marco Vuerich1, Francesco Boscutti1, Valentino Volpe2, Michele Fabro2,Urska Vrhovsek3, Elisa Petrussa1

*1Department of Agricultural, Food, Environmental and Animal Sciences (DI4A), University of Udine, Via delle Scienze 206, 33100 Udine, Italy*

*2Servizio fitosanitario e chimico, ricerca, sperimentazione e assistenza tecnica, ERSA, via Sabbatini 5, 33050 Pozzuolo del Friuli (UD), Italy*

*3Foundation Edmund Mach, via Edmund Mach 1, 38098 San Michele all'Adige (TN), Italy*

**Corresponding author email:* [enrico.braidot@uniud.it](mailto:enrico.braidot@uniud.it)

**Table S1.**Collected material for hydroalcoholic extraction and Friuli Venezia Giulia Region site location.

| Species | *Organ* | *Site* |
| --- | --- | --- |
| *Ailanthus altissima*  (Mill.) Swingle | Leaf | Lowland rural site  Pagnacco (Udine)  46° 7' 30.63''N; 13° 11' 44.01''E |
| *Humulus lupulus* L. | Flowers (hops) | “Severino Garlatti Costa” brewery  Flagogna (Udine)  46° 12' 18.890"N; 12° 57' 6.141"E |
| *Olea europaea*L*.,*  cv. Gargazzo | Leaf | Experimental farm “A. Servadei”  University of Udine  46° 2′ 3.79''N; 13° 13′ 38.34''E |
| *Ulva*sp. | Thallus | Marano lagoon (Udine)  45° 42′ 1.84''N; 13° 9′ 3.35''E |

**Fig. S1.** Process to determine the inhibition; **a** representative images of Petri dishes used in agar-well diffusion test showing inhibition of *A. flavus* mycelium growth; the percentage of inhibition was calculated as the ratio between the halo area (red in **b**) and the total area of imaginary circles centered on each hole (yellow circles in **c**), designed so that the circles area was maximum.


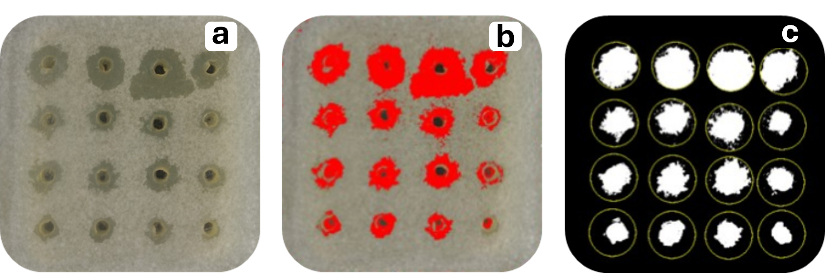


**Fig. S2.** Representative images of Petri dishes used in agar-well diffusion test showing inhibition of A*.*flavus incubated with several dilutions of the four different extracts; upper to lower lanes of wells are incubated with decreasing concentrations of each extract corresponding to rangeof **a** 135-90 g/L *Ailanthus*; **b** 80-20 g/L *Olea*; **c** 110-80 g/L *Humulus* trub; **d** 50-30 g/L *Ulva*, **e** similar aliquots of hydroalcoholic solutions without extract were used as negative control.


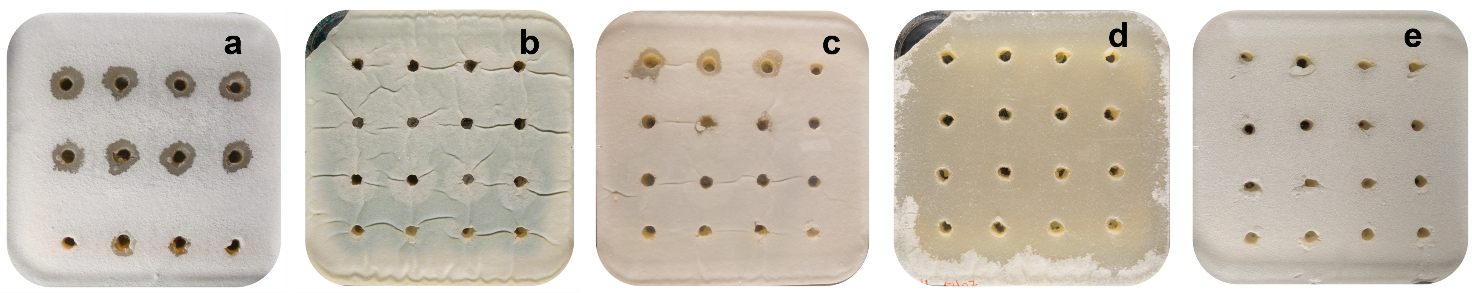


**Table S2.**One-way ANOVA analysis of the effect of extract on logistic parameters of the antifungal activity dose-response curves.

| **Parameter** | **Df** | **Sum Sq** | **F value** | **Pr(>F)** |
| --- | --- | --- | --- | --- |
| α | 2 | 88.153 | 18.92 | 0.000598 *** |
| δ | 2 | 4327.90 | 211.53 | 2.72E-08 *** |
| φ | 2 | 35533.00 | 2061.01 | 1.05E-12 *** |

α = lower limit, δ = upper limit, φ = EC50

**Table S3**One-way ANOVA analysis of effect of concentration of *Ulva* extract on germ tube length and conidia germination percentage of *A. flavus* after 16 h of incubation at 28°C

| ***Parameter*** | ***Df*** | ***Sum Sq*** | ***F value*** | ***Pr(>F)*** |
| --- | --- | --- | --- | --- |
| *Germ tube length (µm)* | 3 | 2141 | 23.19 | 1.43E-10 *** |
| *Conidia germination (%)* | 3 | 17553 | 24.00 | 0.000236 *** |

**Fig. S3.**Relative abundance (%) of phenolic compounds per chemical classes identified in *Ailanthus*, *Humulus* trub and *Ulva* extracts.


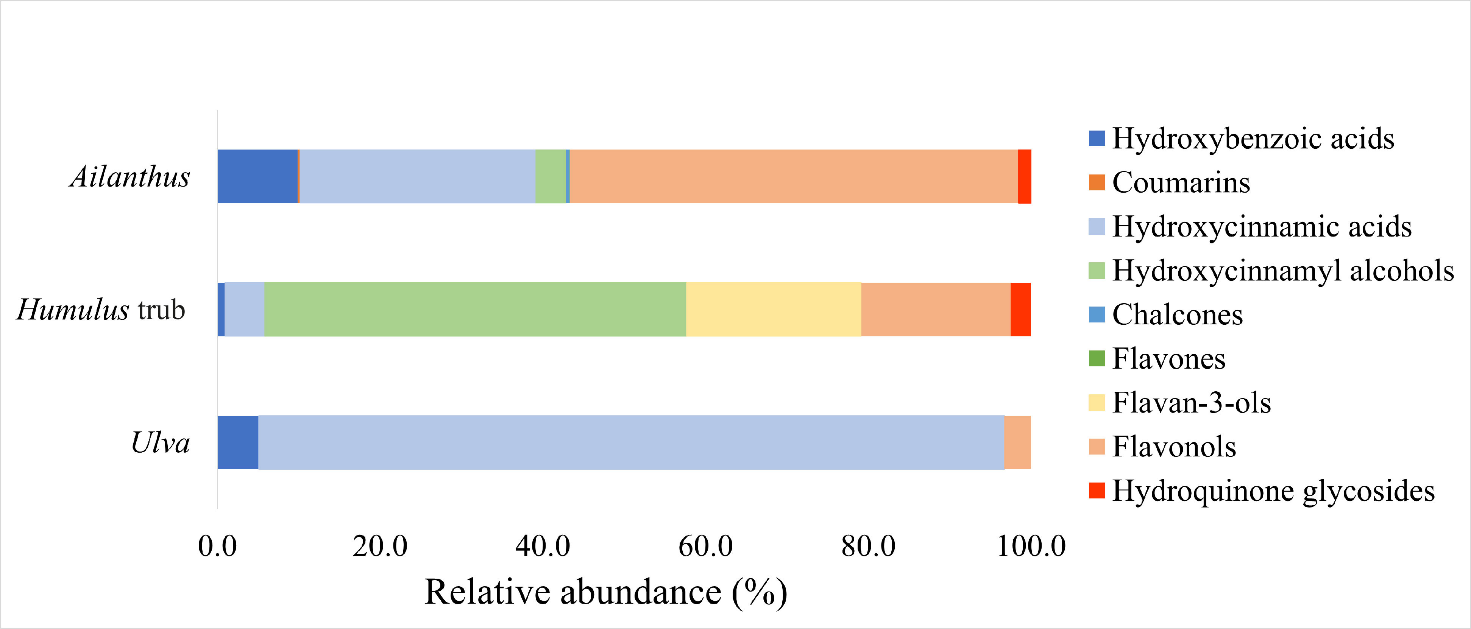

Supplement: Supplementary file 1 [file 072149d597b6c4c519fa9ea6.docx]
